# Supplementary material
Source: PubMed Central journal article supplement (PMC6635786)
Supplement: rccm.201809-1652OC_putnam_data_supplement.pdf [file rccm.201809-1652OC_putnam_data_supplement.pdf]

**Online Data Supplement to “Imaging Patterns are Associated with Interstitial Lung Abnormality Progression and Mortality”**

**RESULTS**

**Table E1.** Baseline characteristics of participants stratified by interstitial lung abnormality (ILA) status on the second CT scan\*

|                                      | No ILA† (0)<br>(N=1792, 57%) | Indeterminate<br>(1)<br>(N=1091, 34%) | ILA (2)<br>(N=284, 9%) | P-Value |         |
|--------------------------------------|------------------------------|---------------------------------------|------------------------|---------|---------|
|                                      |                              |                                       |                        | All     | 0 vs 2  |
| Age, years                           | 74 ± 5                       | 76 ± 5                                | 76 ± 5                 | <0.0001 | <0.0001 |
| Sex                                  |                              |                                       |                        |         |         |
| - female                             | 1082 (60%)                   | 621 (57%)                             | 128 (45%)              | <0.0001 | <0.0001 |
| - male                               | 710 (40%)                    | 470 (43%)                             | 156 (55%)              |         |         |
| Body Mass Index (kg/m <sup>2</sup> ) | 27 ± 4                       | 27 ± 2                                | 28 ± 4                 | 0.8     | 0.02    |
| Pack-Years Smoking, median (IQR‡)    | 0 (15)                       | 2 (20)                                | 11 (31)                | <0.0001 | <0.0001 |
| Smoking Status                       |                              |                                       |                        |         |         |
| - Never                              | 848 (47%)                    | 449 (41%)                             | 78 (27%)               | <0.0001 | <0.0001 |
| - Former                             | 756 (42%)                    | 522 (48%)                             | 169 (60%)              |         |         |
| - Current                            | 188 (11%)                    | 120 (11%)                             | 36 (13%)               |         |         |
| <i>MUC5B</i>                         |                              |                                       |                        |         |         |
| - GG                                 | 1436 (80%)                   | 800 (73%)                             | 168 (59%)              | <0.0001 | <0.0001 |
| - GT                                 | 340 (19%)                    | 274 (25%)                             | 105 (37%)              |         |         |
| - TT                                 | 15 (1%)                      | 15 (1%)                               | 10 (4%)                |         |         |

\* ± values are means ± standard deviation

† ILA is interstitial lung abnormality

‡ IQR is interquartile range

|| *MUC5B* is the genotype at the *MUC5B* promoter polymorphism (rs35705950). The total N for genotype may be less than the N for each ILA subtype, as it is based on the number of participants with genotype available, and due to rounding not all percentages add to 100%.

**Table E2.** Multivariable logistic regression to assess factors associated with ILA progression, comparing those with imaging progression to those without imaging progression and comparing those with imaging progression to those without ILA on either CT scan, where ILA is limited to those with an indeterminate for UIP pattern.

| Covariate                | Comparison of ILA with Progression to ILA without Progression | P-Value | Comparison of ILA with Progression to No ILA | P-Value |
|--------------------------|---------------------------------------------------------------|---------|----------------------------------------------|---------|
|                          | OR*<br>(95% CI†)                                              |         | OR<br>(95% CI)                               |         |
| <i>MUC5B</i> Genotype‡   | 2.5<br>(1.2, 4.9)                                             | 0.01    | 2.6<br>(1.9, 3.5)                            | <0.0001 |
| Age                      | 1.05<br>(0.98, 1.1)                                           | 0.2     | 1.08<br>(1.04, 1.1)                          | <0.0001 |
| Sex¶                     | 0.8<br>(0.4, 1.6)                                             | 0.6     | 0.6<br>(0.4, 0.8)                            | 0.0006  |
| Body-Mass Index§         | 1.04<br>(0.96, 1.1)                                           | 0.4     | 1.08<br>(1.04, 1.1)                          | 0.0001  |
| Pack-years smoking**     | 1.0<br>(0.98, 1.01)                                           | 0.6     | 1.01<br>(1.005, 1.02)                        | 0.0006  |
| Current Smoking Status†† | 1.2<br>(0.4, 3.7)                                             | 0.7     | 0.9<br>(0.5, 1.6)                            | 0.7     |

\*OR is odds ratio

†CI is confidence interval

‡OR is per copy of *MUC5B* minor allele

||OR is for each additional year older.

¶||OR is for comparison of female to male.

§OR is for 1 kg/m<sup>2</sup> increase in body-mass index.

\*\*OR is for each additional pack-year smoked.

††OR is for the comparison of current to former/never.

**Table E3.** Multivariable logistic regression to assess factors associated with ILA progression, comparing those with imaging progression to those without imaging progression.

| Covariate                | Comparison of ILA with Progression to ILA without Progression | P-Value |
|--------------------------|---------------------------------------------------------------|---------|
|                          | OR*<br>(95% CI†)                                              |         |
| <i>MUC5B</i> Genotype‡   | 3.4<br>(1.7, 6.9)                                             | 0.0006  |
| Age                      | 1.06<br>(0.99, 1.14)                                          | 0.1     |
| Sex¶                     | 0.6<br>(0.3, 1.2)                                             | 0.2     |
| Body-Mass Index§         | 0.97<br>(0.9, 1.05)                                           | 0.5     |
| Pack-years smoking**     | 1.005<br>(0.99, 1.02)                                         | 0.5     |
| Current Smoking Status†† | 1.4<br>(0.5, 4.1)                                             | 0.6     |
| Centrilobular Nodules    | 0.2<br>(0.1, 0.5)                                             | 0.0002  |

\*OR is odds ratio

†CI is confidence interval

‡OR is per copy of *MUC5B* minor allele

||OR is for each additional year older.

¶||OR is for comparison of female to male.

§OR is for 1 kg/m<sup>2</sup> increase in body-mass index.

\*\*OR is for each additional pack-year smoked.

††OR is for the comparison of current to former/never.

**Table E4.** Multivariable logistic regression to assess factors associated with ILA progression, comparing those with imaging progression to those without imaging progression.

| Covariate                     | Comparison of ILA with Progression to ILA without Progression | P-Value |
|-------------------------------|---------------------------------------------------------------|---------|
|                               | OR*<br>(95% CI†)                                              |         |
| <i>MUC5B</i> Genotype‡        | 3.4<br>(1.7, 6.9)                                             | 0.0007  |
| Age                           | 1.08<br>(1.02, 1.1)                                           | 0.06    |
| Sex¶                          | 0.6<br>(0.3, 1.3)                                             | 0.2     |
| Body-Mass Index§              | 1.0<br>(0.9, 1.1)                                             | 0.9     |
| Pack-years smoking**          | 1.01<br>(0.98, 1.02)                                          | 0.5     |
| Current Smoking Status††      | 1.5<br>(0.5, 4.7)                                             | 0.5     |
| Subpleural Reticular Markings | 6.4<br>(2.2, 19)                                              | 0.0008  |

\*OR is odds ratio

†CI is confidence interval

‡OR is per copy of *MUC5B* minor allele

||OR is for each additional year older.

¶OR is for comparison of female to male.

§OR is for 1 kg/m<sup>2</sup> increase in body-mass index.

\*\*OR is for each additional pack-year smoked.

††OR is for the comparison of current to former/never.

**Table E5.** Multivariable logistic regression to assess factors associated with ILA progression, comparing those with imaging progression to those without imaging progression.

| Covariate                | Comparison of ILA with Progression to ILA without Progression | P-Value |
|--------------------------|---------------------------------------------------------------|---------|
|                          | OR*<br>(95% CI†)                                              |         |
| <i>MUC5B</i> Genotype‡   | 3.6<br>(1.8, 7.1)                                             | 0.0003  |
| Age                      | 1.08<br>(0.99, 1.2)                                           | 0.08    |
| Sex¶                     | 0.5<br>(0.3, 1.1)                                             | 0.09    |
| Body-Mass Index§         | 1.01<br>(0.94, 1.1)                                           | 0.7     |
| Pack-years smoking**     | 1.002<br>(0.98, 1.02)                                         | 0.8     |
| Current Smoking Status†† | 1.0<br>(0.3, 3.0)                                             | 1.0     |
| Nonemphysematous Cysts   | 2.5<br>(1.8, 7.1)                                             | 0.009   |

\*OR is odds ratio

†CI is confidence interval

‡OR is per copy of *MUC5B* minor allele

||OR is for each additional year older.

¶||OR is for comparison of female to male.

§OR is for 1 kg/m<sup>2</sup> increase in body-mass index.

\*\*OR is for each additional pack-year smoked.

††OR is for the comparison of current to former/never.

**Table E6.** Multivariable logistic regression to assess factors associated with ILA progression, comparing those with imaging progression to those without imaging progression.

| Covariate                      | Comparison of ILA with Progression to ILA without Progression | P-Value |
|--------------------------------|---------------------------------------------------------------|---------|
|                                | OR*<br>(95% CI†)                                              |         |
| <i>MUC5B</i> Genotype‡         | 5.0<br>(1.8, 13)                                              | 0.002   |
| Age                            | 1.08<br>(.97, 1.2)                                            | 0.2     |
| Sex¶                           | 0.4<br>(0.2, 1.1)                                             | 0.08    |
| Body-Mass Index§               | 1.0<br>(0.9, 1.1)                                             | 1.0     |
| Pack-years smoking**           | 1.05<br>(1.006, 1.09)                                         | 0.02    |
| Current Smoking Status††       | 1.4<br>(0.2, 8.4)                                             | 0.7     |
| Lower Lobe Predominant Changes | 6.7<br>(1.8, 25)                                              | 0.004   |

\*OR is odds ratio

†CI is confidence interval

‡OR is per copy of *MUC5B* minor allele

||OR is for each additional year older.

¶OR is for comparison of female to male.

§OR is for 1 kg/m<sup>2</sup> increase in body-mass index.

\*\*OR is for each additional pack-year smoked.

††OR is for the comparison of current to former/never.

**Table E7.** Multivariable logistic regression to assess factors associated with ILA progression, comparing those with imaging progression to those without imaging progression.

| Covariate                | Comparison of ILA with Progression to ILA without Progression | P-Value |
|--------------------------|---------------------------------------------------------------|---------|
|                          | OR*<br>(95% CI†)                                              |         |
| <i>MUC5B</i> Genotype‡   | 3.7<br>(1.8, 7.7)                                             | 0.0004  |
| Age                      | 1.07<br>(0.99, 1.2)                                           | 0.09    |
| Sex¶                     | 0.5<br>(0.2, 1.1)                                             | 0.07    |
| Body-Mass Index§         | 1.03<br>(0.95, 1.1)                                           | 0.5     |
| Pack-years smoking**     | 1.0<br>(0.99, 1.02)                                           | 0.9     |
| Current Smoking Status†† | 0.99<br>(0.3, 3.1)                                            | 1.0     |
| Traction Bronchiectasis  | 6.6<br>(2.3, 19)                                              | 0.0004  |

\*OR is odds ratio

†CI is confidence interval

‡OR is per copy of *MUC5B* minor allele

||OR is for each additional year older.

¶OR is for comparison of female to male.

§OR is for 1 kg/m<sup>2</sup> increase in body-mass index.

\*\*OR is for each additional pack-year smoked.

††OR is for the comparison of current to former/never.

**Table E8.** Radiologic features and imaging patterns on CT scan with ILA, at baseline (Round 1) and follow up (Round 2), with round 1 subset by ILA cases with a follow up scan\*

|                                | Round 1<br>(All ILA Cases,<br>N=378) | Round 1<br>(ILA cases with follow<br>up scan, N=172) | Round 2<br>(All ILA cases,<br>N=284) |
|--------------------------------|--------------------------------------|------------------------------------------------------|--------------------------------------|
| Ground Glass                   | 378 (100%)                           | 172 (100%)                                           | 284 (100%)                           |
| Centrilobular Nodules          | 126 (33%)                            | 66 (38%)                                             | 70 (25%)                             |
| Reticular Markings             | 337 (89%)                            | 146 (85)                                             | 258 (91%)                            |
| Nonemphysematous<br>Cysts      | 225 (60%)                            | 97 (56%)                                             | 174 (61%)                            |
| Traction Bronchiectasis        | 138 (34%)                            | 47 (27%)                                             | 67 (24%)                             |
| Honeycombing                   | 16 (4%)                              | 5 (3%)                                               | 8 (3%)                               |
| <b>Imaging Patterns</b>        |                                      |                                                      |                                      |
| Lower Lobe Predominant         | 250 (66%)                            | 103 (60%)                                            | 207 (73%)                            |
| Upper Lobe Predominant         | 29 (8%)                              | 18 (10%)                                             | 16 (6%)                              |
| Diffuse                        | 71 (19%)                             | 38 (22%)                                             | 37 (13%)                             |
| Multifocal                     | 28 (7%)                              | 13 (8%)                                              | 23 (8%)                              |
| <b>Subtypes</b>                |                                      |                                                      |                                      |
| Subpleural Subtype             | 237 (63%)                            | 102 (59%)                                            | 188 (66%)                            |
| Centrilobular Subtype          | 39 (10%)                             | 26 (15%)                                             | 22 (8%)                              |
| Mixed Subtype                  | 85 (22%)                             | 39 (23%)                                             | 51 (18%)                             |
| Radiologic Evidence of<br>ILD‡ | 17 (5%)                              | 5 (3%)                                               | 23 (8%)                              |
| <b>Fibrosis</b>                |                                      |                                                      |                                      |
| Definite Fibrosis              | 129 (34%)                            | 46 (27%)                                             | 70 (25%)                             |
| Without Fibrosis               | 249 (66%)                            | 126 (73%)                                            | 214 (75%)                            |
| <b>Diagnosis</b>               |                                      |                                                      |                                      |
| Non-IPF‡ Diagnosis             | 145 (38%)                            | 70 (41%)                                             | 84 (30%)                             |
| Indeterminate for UIP          | 134 (35%)                            | 67 (39%)                                             | 139 (49%)                            |
| Probable UIP                   | 82 (22%)                             | 30 (17%)                                             | 54 (19%)                             |
| UIP                            | 17 (5%)                              | 5 (3%)                                               | 7 (2%)                               |

\*ILA is interstitial lung abnormality

†ILD is interstitial lung disease

‡IPF is idiopathic pulmonary fibrosis

||UIP is usual interstitial pneumonia



**Table E9.** Association between imaging patterns and interstitial lung abnormality (ILA) progression.

|                             | Unadjusted Analysis | P-Value | Adjusted*        | P-Value |
|-----------------------------|---------------------|---------|------------------|---------|
|                             | OR† (95% CI‡)       |         | OR (95% CI)      |         |
| Definite Fibrosis           | 7.2<br>(2.7-20)     | <0.0001 | 8.4<br>(2.7-26)  | 0.0003  |
| Subpleural Predominant      | 9.7<br>(3.5-27)     | <0.0001 | 9.1<br>(2.7-30)  | 0.0003  |
| Mixed¶                      | 3.9<br>(1.3-12)     | 0.02    | 3.3<br>(0.99-11) | 0.05    |
| Radiologic Evidence of ILD§ | --                  | --      | --               | --      |

\*Adjusted for age, sex, *MUC5B* minor allele, and smoking behavior.

†OR=odds ratio

‡CI=confidence interval

||Comparison is made to centrilobular predominant ILA

¶Mixed=combination of subpleural and centrilobular, comparison is made to centrilobular predominant ILA

§ILD=interstitial lung disease, no comparisons could be made as all participants with radiologic evidence of ILD had imaging progression.

**Table E10.** Imaging pattern and progression information of the five participants with definite fibrosis on the first CT\* scan that did not have imaging progression.

|               | Imaging Pattern<br>Baseline CT Scan                                     | Progression       | Imaging Pattern<br>Follow-up CT Scan                                   |
|---------------|-------------------------------------------------------------------------|-------------------|------------------------------------------------------------------------|
| Participant 1 | Mixed subpleural and centrilobular / consistent with non-IPF† diagnosis | No change         | Predominantly Subpleural / Indeterminate for UIP‡                      |
| Participant 2 | Mixed subpleural and centrilobular / consistent with non-IPF diagnosis  | No change         | Mixed subpleural and centrilobular / consistent with non-IPF diagnosis |
| Participant 3 | Mixed subpleural and centrilobular / consistent with non-IPF diagnosis  | No Change         | Indeterminate for ILA                                                  |
| Participant 4 | Mixed subpleural and centrilobular / consistent with non-IPF diagnosis  | Probably improved | Indeterminate for ILA                                                  |
| Participant 5 | Mixed subpleural and centrilobular / consistent with non-IPF diagnosis  | Probably improved | Mixed subpleural and centrilobular / consistent with non-IPF diagnosis |

\*CT is computed tomography

†IPF is idiopathic pulmonary fibrosis

‡UIP=usual interstitial pneumonia

|| ILA=interstitial lung abnormalities

**Table E11.** Association between imaging pattern and mortality.

|                                                  | Unadjusted Analysis | P-value | Adjusted* Analysis | P-value |
|--------------------------------------------------|---------------------|---------|--------------------|---------|
|                                                  | HR† (95% CI‡)       |         | HR (95% CI)        |         |
| Alternate Non-IPF¶<br>Diagnosis without fibrosis | 1.4<br>(1.3-2.0)    | 0.0001  | 1.5<br>(1.2-2.0)   | 0.0003  |
| Alternate Non-IPF<br>Diagnosis with fibrosis     | 3.0<br>(2.0-4.4)    | <0.0001 | 2.0<br>(1.4-3.0)   | 0.0006  |

\* Adjusted analyses are adjusted for age, sex, pack-years smoking, current smoking status, and body-mass index.

†HR is hazard ratio

‡CI=confidence interval

¶IPF=idiopathic pulmonary fibrosis.

||Comparisons are to participants without interstitial lung abnormalities.
